# Supplementary material for: Flowering induction in the bioenergy grass Miscanthus sacchariflorus is a quantitative short-day response, whilst delayed flowering under long days increases biomass accumulation
Source: PubMed Central journal article supplement — J Exp Bot. 2012 Nov 26;64(2):541–52. doi: 10.1093/jxb/ers346 (PMC3542045; doi:10.1093/jxb/ers346), 2012-11-26
Supplement: supp_ers346_jexbot086520_file001.pdf [file supp_ers346_jexbot086520_file001.pdf]

**Flowering induction in the bioenergy grass *Miscanthus sacchariflorus* is a quantitative short day response, whilst delayed flowering under long days increases biomass accumulation**

*Elaine Jensen, Paul Robson, John Norris, Alan Cookson, Kerrie Farrar, Iain Donnison, and John Clifton-Brown*

Supplementary Table S1. Summary statistics for Experiment 1, impact of sloped, stepped, and static photoperiods on leaf number and stem length in two lines of *Miscanthus sacchariflorus*.

|                  | Line  |       | Treatment |       |          | Harvest (days) |       |       |       |       |
|------------------|-------|-------|-----------|-------|----------|----------------|-------|-------|-------|-------|
|                  | 1     | 2     | slope     | step  | constant | 18             | 36    | 54    | 72    | 90    |
| Leaf number      |       |       |           |       |          |                |       |       |       |       |
| mean             | 13.64 | 14.04 | 13.12     | 13.77 | 13.5     | 6.662          | 10.02 | 13.49 | 16.73 | 21.07 |
| minimum          | 5     | 5     | 5         | 5     | 4        | 4              | 6     | 6     | 9     | 15    |
| maximum          | 25    | 24    | 25        | 25    | 25       | 10             | 14    | 18    | 24    | 25    |
| <i>n</i> =       | 73    | 75    | 72        | 75    | 74       | 45             | 45    | 45    | 44    | 42    |
| SE               | 0.638 | 0.653 | 0.67      | 0.661 | 0.61     | 0.186          | 0.241 | 0.322 | 0.524 | 0.415 |
| Stem length (mm) |       |       |           |       |          |                |       |       |       |       |
| mean             | 74.67 | 91.65 | 93.98     | 85.81 | 68.65    | 18.54          | 55.29 | 100.4 | 117.6 | 125.1 |
| minimum          | 9.7   | 10    | 9.7       | 11.3  | 12       | 9.7            | 20    | 14.5  | 21    | 48    |
| maximum          | 196   | 214   | 256.5     | 194.5 | 154      | 45.5           | 110.5 | 209   | 214   | 256.5 |
| <i>n</i> =       | 71    | 75    | 72        | 74    | 4.317    | 44             | 45    | 45    | 44    | 41    |
| SE               | 5.348 | 7.031 | 8.01      | 6.358 | 73       | 1.129          | 3.073 | 6.635 | 7.771 | 7.391 |

Supplementary Table S2. Summary of ANOVA results for the impact of long day versus short day photoperiods on six traits in *Miscanthus sacchariflorus* in a controlled glasshouse Experiment 2.

| Variate                     | Source               | df | SS       | F       | <i>p</i> | l.s.d |
|-----------------------------|----------------------|----|----------|---------|----------|-------|
| Days to flag leaf emergence | Genotype             | 5  | 4116.82  | 16.7    | <.001    | 5.33  |
|                             | Treatment            | 1  | 56894.58 | 1153.82 | <.001    | 3.08  |
|                             | Genotype x Treatment | 5  | 2800.12  | 11.36   | <.001    | 7.54  |
|                             | Residual             | 50 | 2465.48  |         |          |       |
|                             | Total                | 67 | 762516   |         |          |       |
| Biomass                     | Genotype             | 5  | 377475   | 28.06   | <.001    | 39.14 |
|                             | Treatment            | 1  | 181044   | 67.29   | <.001    | 22.6  |
|                             | Genotype x Treatment | 5  | 16991    | 1.26    | 0.29     | 55.35 |
|                             | Residual             | 66 | 177561   |         |          |       |
|                             | Total                | 83 | 762516   |         |          |       |
| Tallest stem                | Genotype             | 5  | 294688   | 111.38  | <.001    | 17.37 |
|                             | Treatment            | 1  | 932.7    | 1.76    | 0.189    | 10.03 |
|                             | Genotype x Treatment | 5  | 22940    | 8.67    | <.001    | 24.56 |
|                             | Residual             | 64 | 33867.6  |         |          |       |
|                             | Total                | 81 | 350360.7 |         |          |       |
| Leaf number                 | Genotype             | 5  | 926.667  | 89.1    | <.001    | 1.09  |
|                             | Treatment            | 1  | 105.19   | 50.57   | <.001    | 0.63  |
|                             | Genotype x Treatment | 5  | 26.524   | 2.55    | 0.036    | 1.54  |
|                             | Residual             | 66 | 137.286  |         |          |       |
|                             | Total                | 83 | 1202.952 |         |          |       |
| Internode length            | Genotype             | 5  | 260.612  | 36.73   | <.001    | 0.9   |
|                             | Treatment            | 1  | 0.892    | 0.63    | 0.431    | 0.52  |
|                             | Genotype x Treatment | 5  | 41.388   | 5.83    | <.001    | 1.27  |
|                             | Residual             | 65 | 92.238   |         |          |       |
|                             | Total                | 82 | 413.631  |         |          |       |
| Stem number                 | Genotype             | 5  | 5954.52  | 100.66  | <.001    | 2.6   |
|                             | Treatment            | 1  | 55.05    | 4.65    | 0.035    | 1.5   |
|                             | Genotype x Treatment | 5  | 129.24   | 2.18    | 0.066    | 3.67  |
|                             | Residual             | 66 | 780.86   |         |          |       |
|                             | Total                | 83 | 6957.67  |         |          |       |

Supplementary Table S3. Summary of ANOVA results for the impact of warm versus cool temperatures on six traits in *Miscanthus sacchariflorus* in a controlled glasshouse Experiment 2.

| Variate                     | Source               | df | SS       | F      | <i>p</i> | l.s.d |
|-----------------------------|----------------------|----|----------|--------|----------|-------|
| Days to flag leaf emergence | Genotype             | 5  | 2671.82  | 51.4   | <.001    | 2.43  |
|                             | Treatment            | 1  | 186.01   | 17.89  | <.001    | 1.41  |
|                             | Genotype x Treatment | 5  | 88.77    | 1.71   | 0.145    | 3.44  |
|                             | Residual             | 66 | 686.14   |        |          |       |
|                             | Total                | 83 | 3716.04  |        |          |       |
| Biomass                     | Genotype             | 5  | 274041.9 | 61.05  | <.001    | 22.61 |
|                             | Treatment            | 1  | 133.8    | 0.15   | 0.701    | 13.05 |
|                             | Genotype x Treatment | 5  | 3127.4   | 0.7    | 0.628    | 31.98 |
|                             | Residual             | 66 | 59252.6  |        |          |       |
|                             | Total                | 83 | 342757.1 |        |          |       |
| Tallest stem                | Genotype             | 5  | 410794.2 | 150.18 | <.001    | 17.66 |
|                             | Treatment            | 1  | 11095.6  | 20.28  | <.001    | 10.2  |
|                             | Genotype x Treatment | 5  | 2857.1   | 1.04   | 0.399    | 24.98 |
|                             | Residual             | 64 | 35011.8  |        |          |       |
|                             | Total                | 81 | 452756.5 |        |          |       |
| Leaf number                 | Genotype             | 5  | 1335.06  | 69.3   | <.001    | 1.48  |
|                             | Treatment            | 1  | 4.298    | 1.12   | 0.295    | 0.86  |
|                             | Genotype x Treatment | 5  | 16.774   | 0.87   | 0.506    | 2.1   |
|                             | Residual             | 66 | 254.286  |        |          |       |
|                             | Total                | 83 | 1637.56  |        |          |       |
| Internode length            | Genotype             | 5  | 310.271  | 27.49  | <.001    | 1.13  |
|                             | Treatment            | 1  | 36.126   | 16     | <.001    | 0.66  |
|                             | GenotypexTreatment   | 5  | 9.936    | 0.88   | 0.499    | 1.6   |
|                             | Residual             | 65 | 146.739  |        |          |       |
|                             | Total                | 82 | 507.223  |        |          |       |
| Stem number                 | Genotype             | 5  | 4424.49  | 64.28  | <.001    | 2.8   |
|                             | Treatment            | 1  | 157.44   | 11.44  | 0.001    | 1.616 |
|                             | Genotype x Treatment | 5  | 117.63   | 1.71   | 0.145    | 3.96  |
|                             | Residual             | 66 | 908.52   |        |          |       |
|                             | Total                | 83 | 5770.99  |        |          |       |

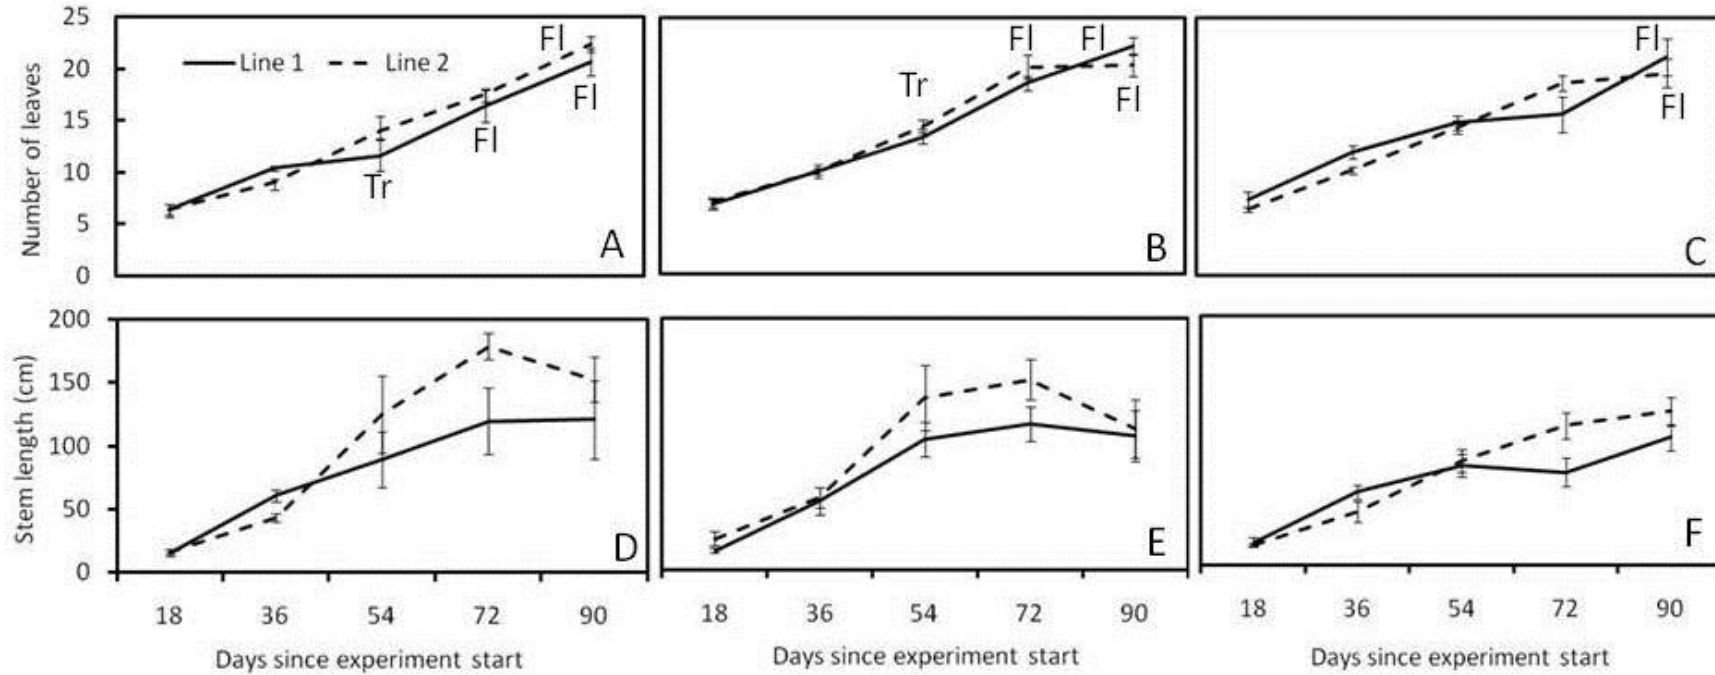

Supplementary Fig.S1 Leaf formation (A-C), stem elongation (D-F), floral transition (Tr), and flag leaf exertion (FI) in lines 1 and 2 from Experiment 1, under sloped (A, D), stepped (B, E), and constant (C, F) photoperiods  $\pm$ SE (n=5). Tr and FI are noted adjacent to the line in which this phenotype was observed.
